# Supplementary material
Source: Copernicus journal article supplement (doi:10.5194/soil-12-545-2026)
Supplement: Supplementary file 1 [file soil-12-545-2026-supplement.pdf]

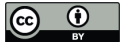

*Supplement of*

## **Soil health approaches to assess the impacts of no-tillage with agricultural terraces in southern Brazil**

**Ariane Lentice de Paula et al.**

*Correspondence to:* Ariane Lentice de Paula ([ariane.le.paula@gmail.com](mailto:ariane.le.paula@gmail.com))

The copyright of individual parts of the supplement might differ from the article licence.

## Supplementary material

**Table S1.** Methods used in the analyses of the soil health indicators within the database, along with their corresponding references.

| Indicators                         | Methods                                                                       | References             |
|------------------------------------|-------------------------------------------------------------------------------|------------------------|
| Clay                               | Granulometric analysis                                                        | Gee and Or (2002)      |
| Silt                               | Granulometric analysis                                                        | Gee and Or (2002)      |
| Sand                               | Granulometric analysis                                                        | Gee and Or (2002)      |
| Bulk Density (BD)                  | Cylinder with undisturbed soil sample                                         | Teixeira et al., 2017  |
| Total Porosity (TP)                | Cylinder with undisturbed soil sample                                         | Teixeira et al., 2017  |
| Macroporosity (Macro)              | Macro = TP - Micro                                                            | Teixeira et al., 2017  |
| Microporosity (Micro)              | Cylinder with undisturbed soil sample in tension table of 6 kPa               | Teixeira et al., 2017  |
| Field Capacity (FC)                | Cylinder with undisturbed soil sample in tension table of 6 kPa               | Teixeira et al., 2017  |
| Permanent Wilting Point (PWP)      | Measured at -1500 kPa using WP4 dew point potentiometer                       |                        |
| Plant Available Water (PAW)        | PAW = FC - PWP                                                                | Teixeira et al., 2017  |
| Soil Water Storage Capacity (SWSC) | SWSC = FC / PT                                                                | Reynolds et al. (2007) |
| Soil Aeration Capacity (SAC)       | SAC = 1-SWSC                                                                  | Reynolds et al. (2007) |
| Soil Penetration Resistance (SPR)  | By field penetrometer                                                         | Bowen (1981)           |
| pH <sub>H2O</sub>                  | Soil:water ratio of 2.5:1                                                     | Pavan et al., 1992     |
| pH <sub>CaCl2</sub>                | Soil:Solution ratio 2.5:1                                                     | Pavan et al., 1992     |
| Exchangeable Aluminum (Al)         | KCl extraction and NaOH titration                                             | Pavan et al., 1992     |
| Potential Acidity (H+Al)           | SMP buffer                                                                    | Pavan et al., 1992     |
| Available Phosphorous (P)          | Mehlich-I extraction method and measured by absorption molecular spectrometry | Pavan et al., 1992     |
| Exchangeable Potassium (K)         | Mehlich-I extraction method and flame photometry                              | Pavan et al., 1992     |
| Exchangeable Calcium (Ca)          | KCl extraction and EDTA titration                                             | Pavan et al., 1992     |
| Exchangeable Magnesium (Mg)        | KCl extraction and EDTA titration                                             | Pavan et al., 1992     |
| Cation Exchange Capacity (CEC)     | Sum of Ca+Mg+K+H+Al                                                           | Pavan et al., 1992     |

|                                                               |                                 |            |                                                                 |
|---------------------------------------------------------------|---------------------------------|------------|-----------------------------------------------------------------|
| Cation Exchange Capacity at pH 7.0<br>(CEC <sub>pH7.0</sub> ) | Sum of SB + Al                  |            | Pavan et al., 1992                                              |
| Sum of bases (SB)                                             | (Ca+Mg+K)                       |            | Pavan et al., 1992                                              |
| Base saturation (BS)                                          | [(Ca+Mg+K)/CEC]*100             |            | Pavan et al., 1992                                              |
| Organic Carbon (OC)                                           | Walkley-Black method            |            | Pavan et al., 1992                                              |
| Organic Matter (SOM)                                          | OC x 1.72 = SOM                 |            | Pavan et al., 1992                                              |
| Microbial Carbon Biomass (MCB)                                | Chloroform-fumigation<br>method | extraction | Vance et al. (1987)                                             |
| β-glucosidase Activity (BG)                                   | P-method                        |            | Tabatabai et al. (1982) adapted by<br>Eivazi e Tabatabai (1988) |
| Arylsulfatase Activity (A)                                    | P-method                        |            | Tabatabai and Bremmer (1970)                                    |

---

5 **Table S2.** Soil health indicators and scoring curves for SMAF.

| Indicator      | Class Factor | Characteristic                                                                                                                                                                                                                                                                                                                                           | Class Factor of the present study                    |
|----------------|--------------|----------------------------------------------------------------------------------------------------------------------------------------------------------------------------------------------------------------------------------------------------------------------------------------------------------------------------------------------------------|------------------------------------------------------|
| Organic Matter | 1            | Soil Taxonomic suborders with high organic matter content:<br>Aquands; Aquods; Aquox; Fibrists; Folists; Hemists; Histels;<br>Saprist; Turbels                                                                                                                                                                                                           | 4                                                    |
|                | 2            | Soil Taxonomic suborders: Albolls; Aquepts; Aquerts; Aquolls;<br>Aquults; Borolls; Cryolls; Humods; Humults; Rendolls;<br>Udands; Udolls; Ustands; Usterts; Ustolls; Xererts; Xerolls                                                                                                                                                                    |                                                      |
|                | 3            | Soil Taxonomic suborders: Andepts; Anthrepts; Aqualfs;<br>Aquents; Boralfs; Cryalfs; Cryands; Cryerts; Cryods; Orthels;<br>Udalfs; Ustalfs; Vitrand; Xeralfs                                                                                                                                                                                             |                                                      |
|                | 4            | Soil Taxonomic suborders with low organic matter content:<br>Arents; Argids; Calcids; Cambids; Cryepts; Cryids; Durids;<br>Fluents; Gypsids; Ochrepts; Orthents; Orthids; Orthods;<br>Orthox; Perox; Psamments; Salids; Torrands; Torrerts; Torrox;<br>Topepts; Udepts; Udults; Umbrepts; Ustepts; Ustox; Ustults;<br>Xerands; Xerepts; Xerents; Xerults |                                                      |
| Texture        | 1            | Sand, loamy sand, or sandy loam (with < 8% clay)                                                                                                                                                                                                                                                                                                         | 2 and 4                                              |
|                | 2            | Sandy loam (with >8% clay)                                                                                                                                                                                                                                                                                                                               |                                                      |
|                | 3            | Silt loam, silt                                                                                                                                                                                                                                                                                                                                          |                                                      |
|                | 4            | Sandy clay, clay loam, silty clay loam, silty clay, or clay (with <60% clay)                                                                                                                                                                                                                                                                             |                                                      |
|                | 5            | Clay, with > 60% clay                                                                                                                                                                                                                                                                                                                                    |                                                      |
| Climate        | 1            | hi/hi->=170° days and >=550ppt                                                                                                                                                                                                                                                                                                                           | 1 which is hot and humid                             |
|                | 2            | hi/lo->=170° days and <550ppt                                                                                                                                                                                                                                                                                                                            | climate, ≥ 170-degree                                |
|                | 3            | lo/hi-<170° days and >=550ppt                                                                                                                                                                                                                                                                                                                            | days and ≥ 550 mm                                    |
|                | 4            | lo/lo-<170° days and <550ppt                                                                                                                                                                                                                                                                                                                             | average annual precipitation, used for all locations |

|                                |   |                                                                             |                                         |
|--------------------------------|---|-----------------------------------------------------------------------------|-----------------------------------------|
| Season                         | 1 | Spring                                                                      | 3: soil samples were collected in fall. |
|                                | 2 | Summer                                                                      |                                         |
|                                | 3 | Fall                                                                        |                                         |
|                                | 4 | Winter                                                                      |                                         |
| Fe <sub>2</sub> O <sub>3</sub> | 1 | Ultisols                                                                    | 2                                       |
|                                | 2 | All other suborders                                                         |                                         |
| Mineralogy                     | 1 | Smectitic                                                                   | 3 (1:1 clay and Fe and Al oxides)       |
|                                | 2 | Glassy                                                                      |                                         |
|                                | 3 | Others                                                                      |                                         |
| Slope                          | 1 | 0 to 2% slope                                                               | 3 and 4                                 |
|                                | 2 | 2 to 5% slope                                                               |                                         |
|                                | 3 | 5 to 9 % slope                                                              |                                         |
|                                | 4 | 9 to 15% slope                                                              |                                         |
|                                | 5 | more than 15% slope                                                         |                                         |
| Weathering                     | 1 | calc - calc rxn class                                                       | 2 (oxisols, highly weathered soils)     |
|                                | 2 | hi - ultisols, oxisols, acidic orchepts, (quartzipsamments, ultic Alfisols) |                                         |
|                                | 3 | Slightly - all others                                                       |                                         |
| P Method                       | 1 | Mehlich 1                                                                   | 1                                       |
|                                | 2 | Mehlich 3                                                                   |                                         |
|                                | 3 | Bray                                                                        |                                         |
|                                | 4 | Olsen                                                                       |                                         |
|                                | 5 | Resin                                                                       |                                         |
|                                | 6 | Iron oxide strip                                                            |                                         |

**Table S3.** Median, 1st quartile and 3rd quartile values of the soil's physical, chemical and biological indicators assessed in no-till (NT) and no-till with terraces (NT+T) in 2020, 2021 and 2022.

| Soil Indicator                                                | 2020                  |                       |              | 2021                  |                       |              | 2022                  |                       |              |
|---------------------------------------------------------------|-----------------------|-----------------------|--------------|-----------------------|-----------------------|--------------|-----------------------|-----------------------|--------------|
|                                                               | NT                    | NT+T                  | Significance | NT                    | NT+T                  | Significance | NT                    | NT+T                  | Significance |
|                                                               | Median<br>[Q1-Q3]     | Median<br>[Q1-Q3]     |              | Median<br>[Q1-Q3]     | Median<br>[Q1-Q3]     |              | Median<br>[Q1-Q3]     | Median<br>[Q1-Q3]     |              |
| BD<br>(Mg dm <sup>-3</sup> )                                  | 1.31<br>[1.23-1.39]   | 1.31<br>[1.23-1.39]   | ns           | 1.23<br>[1.15-1.31]   | 1.27<br>[1.20-1.33]   | ns           | 1.48<br>[1.39-1.55]   | 1.46<br>[1.38-1.55]   | ns           |
| TP<br>(m <sup>3</sup> m <sup>-3</sup> )                       | 0.49<br>[0.46-0.52]   | 0.49<br>[0.45-0.51]   | ns           | 0.53<br>[0.50-0.55]   | 0.53<br>[0.49-0.55]   | ns           | 0.49<br>[0.45-0.52]   | 0.50<br>[0.46-0.54]   | *            |
| SPR<br>(MPa)                                                  | 0.91<br>[0.72-1.16]   | 1.22<br>[0.84-1.28]   | *            | 1.09<br>[0.88-1.27]   | 1.34<br>[0.99-1.71]   | **           | 0.77<br>[0.67-0.95]   | 1.22<br>[0.95-1.38]   | ***          |
| SWSC                                                          | 0.71<br>[0.62-0.76]   | 0.72<br>[0.69-0.80]   | *            | 0.53<br>[0.49-0.60]   | 0.60<br>[0.53-0.67]   | **           | 0.72<br>[0.69-0.77]   | 0.72<br>[0.69-0.80]   | ns           |
| pH <sub>CaCl2</sub>                                           | 5.18<br>[4.73-5.43]   | 5.10<br>[4.77-5.34]   | ns           | 5.56<br>[5.24-5.82]   | 4.89<br>[4.69-5.16]   | ***          | 5.11<br>[4.96-5.24]   | 5.01<br>[4.75-5.17]   | *            |
| pH <sub>H2O</sub>                                             | 6.02<br>[5.47 - 6.19] | 5.92<br>[5.56 - 6.21] | ns           | 5.40<br>[5.18 - 5.65] | 5.54<br>[5.30 - 5.92] | ns           | 5.48<br>[5.26-5.61]   | 5.26<br>[5.15 - 5.40] | ***          |
| H+Al<br>(cmol <sub>c</sub> dm <sup>-3</sup> )                 | 5.41<br>[4.46 - 7.42] | 5.37<br>[4.69 - 6.43] | ns           | 6.05<br>[5.50 - 6.94] | 6.32<br>[4.98 - 7.15] | ns           | 5.47<br>[4.52 - 6.81] | 6.05<br>[5.06 - 7.10] | ns           |
| Al<br>(cmol <sub>c</sub> dm <sup>-3</sup> )                   | 0.05<br>[0.01 - 0.11] | 0.06<br>[0.02 - 0.10] | ns           | 0.35<br>[0.30 - 0.61] | 0.32<br>[0.18 - 0.45] | ns           | 0.04<br>[0.00 - 0.18] | 0.05<br>[0.00 - 0.15] | ns           |
| P<br>(mg dm <sup>-3</sup> )                                   | 50.6<br>[32.2-72.7]   | 36.90<br>[24.2-46.8]  | **           | 25.1<br>[15.3-38.7]   | 17.1<br>[12.6-26.4]   | *            | 17.7<br>[11.9-30.2]   | 17.9<br>[11.5-32.3]   | ns           |
| K<br>(cmol <sub>c</sub> dm <sup>-3</sup> )                    | 0.56<br>[0.47-0.71]   | 0.65<br>[0.53-0.87]   | *            | 0.22<br>[0.18-0.27]   | 0.26<br>[0.20-0.31]   | **           | 0.38<br>[0.32-0.45]   | 0.35<br>[0.28-0.44]   | ns           |
| Ca<br>(cmol <sub>c</sub> dm <sup>-3</sup> )                   | 3.78<br>[3.16-4.44]   | 3.34<br>[2.94-3.62]   | **           | 3.03<br>[2.47-3.30]   | 3.07<br>[2.08-3.49]   | ns           | 2.74<br>[2.41-3.95]   | 2.84<br>[2.52-3.38]   | ns           |
| Mg<br>(cmol <sub>c</sub> dm <sup>-3</sup> )                   | 1.09<br>[0.63 - 1.67] | 1.03<br>[0.78 - 1.35] | ns           | 0.59<br>[0.47 - 0.69] | 0.74<br>[0.59 - 1.17] | ***          | 0.74<br>[0.52 - 1.20] | 0.82<br>[0.64 - 1.23] | ns           |
| CEC<br>(cmol <sub>c</sub> dm <sup>-3</sup> )                  | 5.53<br>[4.73 - 6.44] | 5.11<br>[4.44 - 5.82] | *            | 3.52<br>[2.81 - 4.14] | 4.43<br>[3.42 - 5.19] | ***          | 3.90<br>[3.51 - 5.52] | 4.19<br>[3.77 - 4.75] | ns           |
| CEC <sub>pH7.0</sub><br>(cmol <sub>c</sub> dm <sup>-3</sup> ) | 11.3<br>[10.5-12.9]   | 10.9<br>[9.77-11.5]   | **           | 10.3<br>[9.57-10.9]   | 10.3<br>[9.52-11.1]   | ns           | 9.89<br>[9.00-10.8]   | 10.2<br>[9.61-11.1]   | ns           |
| SB                                                            | 5.45                  | 5.06                  | ns           | 3.75                  | 3.92                  | ns           | 3.78                  | 4.14                  | ns           |

|                                                                   |                 |                 |     |                 |                 |     |                 |                 |     |
|-------------------------------------------------------------------|-----------------|-----------------|-----|-----------------|-----------------|-----|-----------------|-----------------|-----|
| ( $\text{cmol}_c \text{ dm}^{-3}$ )                               | [4.64 – 6.42]   | [4.37 – 5.77]   |     | [3.37 – 4.27]   | [3.02 – 4.97]   |     | [3.37 – 5.51]   | [3.59 – 4.75]   |     |
| BS                                                                | 48.5            | 47.5            | ns  | 41.2            | 37.0            | ns  | 43.1            | 40.5            | ns  |
| (%)                                                               | [41.9-58.9]     | [43.2-54.4]     |     | [34.4-50.4]     | [31.6-48.4]     |     | [36.6-52.5]     | [34.0-46.8]     |     |
| OC                                                                | 22.2            | 20.9            | *** | 19.1            | 19.8            | ns  | 18.9            | 21.0            | *** |
| ( $\text{g dm}^{-3}$ )                                            | [21.8-22.5]     | [19.6-21.7]     |     | [17.5-21.6]     | [18.1-21.2]     |     | [16.2-20.7]     | [20.3-22.9]     |     |
| SOM                                                               | 38.20           | 35.90           | *** | 32.90           | 34.10           | ns  | 32.50           | 36.10           | *** |
| ( $\text{g dm}^{-3}$ )                                            | [37.60 – 38.60] | [33.70 – 37.30] |     | [30.00 – 37.20] | [31.10 – 36.40] |     | [27.90 – 35.50] | [34.90 – 39.30] |     |
| MBC                                                               | 230.17          | 325.54          | *** | 439.42          | 392.97          | ns  | 593.46          | 465.05          | *** |
| ( $\text{mg kg}^{-1}$ )                                           | [176.0-295.0]   | [216.0-422.0]   |     | [205.0-460.0]   | [280.0-447.0]   |     | [577.0-613.0]   | [426.0-524.0]   |     |
| BG                                                                | 85.8            | 101.0           | *** | 69.6            | 47.4            | *** | 94.1            | 137.0           | *** |
| ( $\text{mg kg}^{-1} \text{ h}^{-1}$ )                            | [76.2-706.0]    | [92.4-107]      |     | [56.4-86.5]     | [46.2-48.9]     |     | [53.9-141.0]    | [117.0-191.0]   |     |
| A                                                                 | 73.1            | 49.4            | *** | 54.9            | 42.6            | *** | 66.0            | 65.9            | ns  |
| ( $\text{mg } p\text{-nitrophenol kg}^{-1} \text{ soil h}^{-1}$ ) | [49.7-92.8]     | [46.5-54.6]     |     | [45.6-77.5]     | [39.5-45.7]     |     | [45.1-71.9]     | [62.7-66.9]     |     |

10 BD: Bulk Density; TP: Total Porosity; SPR: Soil Penetration Resistance; SWSC: Soil Water Storage Capacity; H+Al: Potential Acidity; Al: Exchangeable Aluminum; P: Available Phosphorous; K: Exchangeable Potassium; Ca: Exchangeable Calcium; Mg: Exchangeable Magnesium; CEC: Cation Exchange Capacity; CECpH7.0: Cation Exchange Capacity at pH 7.0; SB: Sum of bases; BS: Base saturation; OC: Organic Carbon; SOM: Organic Matter; MBC: Microbial Carbon Biomass; BG: Beta-glucosidase Activity; A: Arylsulfatase Activity; Asterisks indicate statistically significant differences between treatment medians according to the Wilcoxon test at the 1% (\*\*\*), 5% (\*\*), and 10% (\*) significance levels; ns: not significant. Medians are based on thirty-six replicates.

15

**Table S4.** Results of principal component analysis (PCA)

|                      | Principal components analysis (PCA) |                      |                      |                      |                      |        |
|----------------------|-------------------------------------|----------------------|----------------------|----------------------|----------------------|--------|
|                      | PC1                                 | PC2                  | PC3                  | PC4                  | PC5                  | PC6    |
| Eigenvalues          | 4.937                               | 3.727                | 2.630                | 1.619                | 1.426                | 0.984  |
| Variance (%)         | 24.684                              | 18.633               | 13.152               | 8.095                | 7.131                | 4.922  |
| Cumulative (%)       | 24.684                              | 43.316               | 56.469               | 64.564               | 71.695               | 76.616 |
| BD                   | 0.427                               | -0.480               | <b><u>0.638</u></b>  | -0.019               | 0.118                | -0.106 |
| TP                   | -0.288                              | 0.534                | -0.438               | 0.014                | <b><u>-0.619</u></b> | 0.010  |
| Macro                | <b><u>-0.868</u></b>                | 0.282                | -0.098               | -0.137               | -0.220               | -0.052 |
| Micro                | 0.770                               | 0.164                | -0.294               | 0.178                | -0.317               | 0.071  |
| PAW                  | 0.768                               | -0.081               | -0.200               | 0.021                | -0.412               | 0.021  |
| SWSC                 | <b><u>0.921</u></b>                 | -0.295               | 0.049                | 0.084                | 0.023                | -0.013 |
| SAC                  | <b><u>-0.921</u></b>                | 0.295                | -0.049               | -0.084               | -0.023               | 0.013  |
| SPR                  | 0.083                               | 0.318                | 0.115                | 0.272                | 0.211                | -0.631 |
| pH <sub>CaCl2</sub>  | -0.619                              | -0.591               | -0.071               | 0.164                | -0.046               | 0.041  |
| P                    | 0.091                               | 0.022                | -0.254               | <b><u>-0.728</u></b> | 0.237                | 0.200  |
| K                    | 0.300                               | -0.371               | -0.418               | -0.319               | 0.129                | 0.243  |
| Al                   | 0.217                               | 0.737                | 0.081                | -0.010               | 0.164                | -0.085 |
| Ca                   | -0.068                              | -0.573               | <b><u>-0.640</u></b> | 0.300                | -0.009               | -0.080 |
| Mg                   | -0.416                              | -0.617               | -0.208               | 0.113                | 0.080                | -0.105 |
| CEC <sub>pH7.0</sub> | 0.331                               | 0.223                | <b><u>-0.689</u></b> | -0.015               | 0.080                | -0.075 |
| BS                   | -0.297                              | <b><u>-0.825</u></b> | -0.323               | 0.217                | 0.010                | -0.032 |
| OC                   | 0.152                               | -0.008               | -0.500               | -0.239               | -0.017               | -0.554 |
| MBC                  | -0.104                              | -0.211               | 0.505                | 0.185                | <b><u>-0.562</u></b> | 0.035  |
| BG                   | 0.230                               | -0.359               | 0.231                | -0.448               | -0.491               | -0.196 |
| A                    | -0.203                              | -0.425               | 0.191                | -0.615               | -0.124               | -0.296 |

Abbreviations, according to Supplementary Table 3.

The underlined values indicate the indicators selected to compose the SHI\_PCA and the underlined ones are those selected by the PCA.

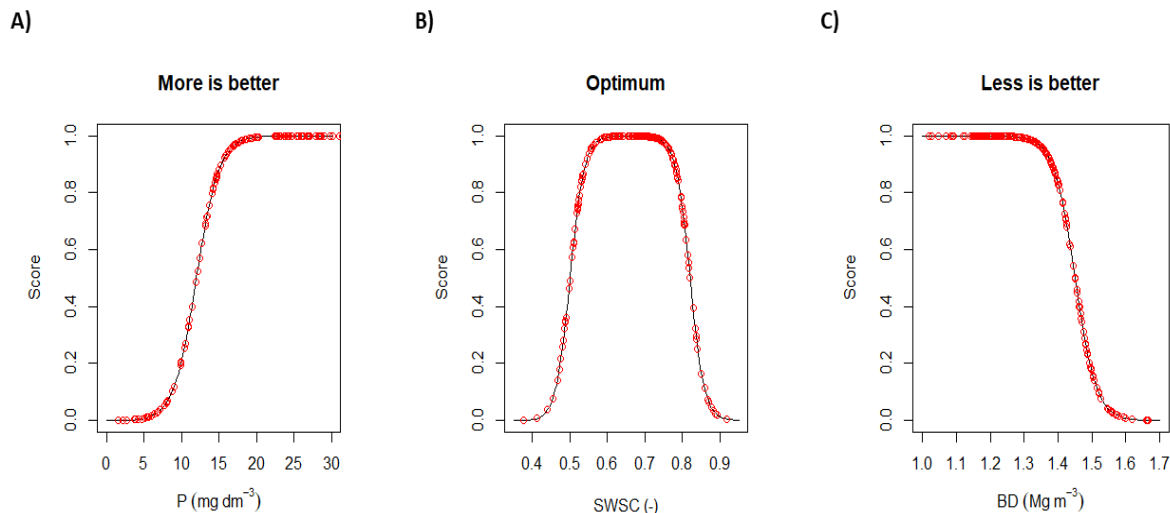

**Figure S1.** Representative scoring curves used to standardize soil health indicators.

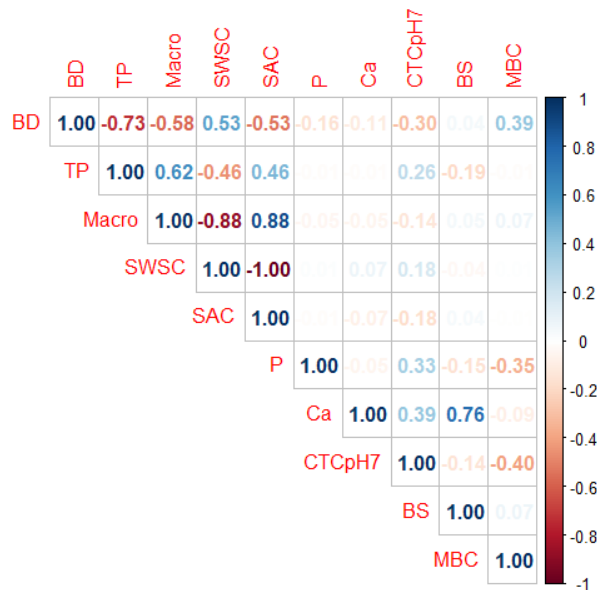

25

**Figure S2.** Spearman correlation matrix for the physical, chemical and biological indicators pre-selected by PCA. The correlations considered for analysis were those with  $r \geq 0.80$  within each PC.

## References

30

Bowen, H. D.: Alleviating mechanical impedance, in: Arkin, G. F. and Taylor, H. M. (Eds.), *Modifying the Root Environment to Reduce Crop Stress*, American Society of Agricultural Engineers, St. Joseph, 21–57, ISBN 0-916150-40-2, 1981.

Eivazi, F. and Tabatabai, M. A.: Glucosidases and galactosidases in soils, *Soil Biol. Biochem.*, 20, 601–606, [https://doi.org/10.1016/0038-0717\(88\)90141-1](https://doi.org/10.1016/0038-0717(88)90141-1), 1988.

35

- Gee, G. W. and Or, D.: Particle-size analysis, in: *Methods of Soil Analysis. Part 4. Physical Methods*, edited by: Dane, J. H. and Topp, G. C., American Society of America, Madison, 255–289, ISBN: 9780891188933, <https://doi.org/10.2136/sssabookser5.4>, 2002.
- Reynolds, W. D., Drury, C. F., Yang, X. M., Fox, C. A., Tan, C. S., and Zhang, T. Q.: Land management effects on the near-surface physical quality of a clay loam soil, *Soil Till. Res.*, 96, 316–330, <https://doi.org/10.1016/j.still.2007.07.003>, 2007.
- 40 Pavan, M. A., Bloch, M. de F., Zempulski, H. da C., Miyazawa, M., and Zocoler, D. C.: *Manual de análise química de solo e controle de qualidade*, IAPAR, Circular Técnica 76, Londrina, 38 pp., ISSN 0100-3356, 1992.
- Tabatabai, M. A. and Bremner, J. M.: Assay of urease activity in soils, *Soil Biol. Biochem.*, 4, 479–487, [https://doi.org/10.1016/0038-0717\(72\)90064-8](https://doi.org/10.1016/0038-0717(72)90064-8), 1972.
- 45 Teixeira, P. C., Donagemma, G. K., Fontana, A., and Teixeira, W. G. (Eds.): *Manual de Métodos de Análise de Solo*, 3rd ed., rev. e ampl., Embrapa, Brasília, DF, 574 pp., ISBN 978-85-7035-771-7, 2017.
